# Supplementary material for: Health related quality of life in adult primary Ciliary dyskinesia patients in Cyprus: development and validation of the Greek version of the QOL-PCD questionnaire
Source: PubMed Central journal article supplement (PMC7178983; doi:10.1186/s12955-020-01360-w), 2020-04-22
Supplement: 12955_2020_1360_MOESM1_ESM.pdf [file 12955_2020_1360_MOESM1_ESM.pdf]

Η κατανόηση των επιπτώσεων της ασθένειας και των θεραπειών που λαμβάνεις στην καθημερινή σου ζωή, μπορεί να βοηθήσει την θεραπευτική σου ομάδα να παρακολουθεί την πορεία της υγείας σου και ανάλογα να προσαρμόζει τις θεραπείες σου. Για τον σκοπό αυτό, το συγκεκριμένο ερωτηματολόγιο ποιότητας ζωής σχεδιάστηκε συγκεκριμένα για άτομα με ΠΔΚ. Ευχαριστούμε για την προθυμία σου να συμπληρώσεις αυτό το ερωτηματολόγιο.

**Οδηγίες:** Οι ακόλουθες ερωτήσεις αφορούν την παρούσα κατάσταση της υγείας σου, όπως την αντιλαμβάνεσαι. Αυτές οι πληροφορίες θα μας επιτρέψουν να κατανοήσουμε καλύτερα πως αισθάνεσαι στην καθημερινή σου ζωή.  
Παρακαλώ απαντήσε όλες τις ερωτήσεις. **Δεν υπάρχουν** σωστές οι λανθασμένες απαντήσεις! Εάν δεν είσαι σίγουρος πως να απαντήσεις, επίλεξε την απάντηση που ανταποκρίνεται καλύτερα στην δική σου κατάσταση.

---

#### Σημείωση για ιατρούς και ερευνητές:

Αυτό το ερωτηματολόγιο μπορεί να χρησιμοποιηθεί με τη σύμφωνο γνώμη της ομάδας των δημιουργών του. Οι δημιουργοί ζητούν όπως τα δεδομένα που θα συλλεχθούν από την χρήση των ερωτηματολογίων, χρησιμοποιηθούν για την περαιτέρω εγκυροποίηση του. Δεδομένα που έχουν σχέση με αυτό το ερωτηματολόγιο δεν μπορούν να χρησιμοποιηθούν πριν από την δημοσίευση των αποτελεσμάτων της μελέτης εγκυροποίησης που διεξήχθη από την ομάδα των δημιουργών, κάτι που αναμένεται να γίνει το Φθινόπωρο του 2016.

Για περισσότερες πληροφορίες και άδειες χρήσης παρακαλώ επικοινωνήστε:

- Για Βόρεια Αμερική: Professor Alexandra Quittner, email: [aquittner@miami.edu](mailto:aquittner@miami.edu)
- Για Ευρώπη: Professor Jane Lucas, email: [jlucas1@soton.ac.uk](mailto:jlucas1@soton.ac.uk)

## Μέρος Ι. Ποιότητα Ζωής

Παρακαλώ σημειώσε (✓)στο κουτάκι που αντιστοιχεί στην απάντησή σου.

Κατά την διάρκεια της περασμένης εβδομάδας, σε ποιο βαθμό δυσκολεύτηκες:

|                                                                          | Αρκετή<br>δυσκολία       | Κάποια<br>δυσκολία       | Λίγη<br>δυσκολία         | Καμία<br>δυσκολία        |
|--------------------------------------------------------------------------|--------------------------|--------------------------|--------------------------|--------------------------|
| 1. Να εκτελείς έντονες δραστηριότητες (οπως κηπουρική ή άσκηση) .....    | <input type="checkbox"/> | <input type="checkbox"/> | <input type="checkbox"/> | <input type="checkbox"/> |
| 2. Να περπατάς το ίδιο γρήγορα με τους άλλους .....                      | <input type="checkbox"/> | <input type="checkbox"/> | <input type="checkbox"/> | <input type="checkbox"/> |
| 3. Να ανέβεις από τις σκάλες περισσότερους από ένα ορόφους .....         | <input type="checkbox"/> | <input type="checkbox"/> | <input type="checkbox"/> | <input type="checkbox"/> |
| 4. Να κουβαλάς βαριά αντικείμενα, όπως βιβλία και τσάντες με ψώνια ..... | <input type="checkbox"/> | <input type="checkbox"/> | <input type="checkbox"/> | <input type="checkbox"/> |

Κατά την διάρκεια της περασμένης εβδομάδας, σημείωσε πόσο συχνά:

|                                  | Πάντα                    | Συχνά                    | Μερικές<br>φορές         | Ποτέ                     |
|----------------------------------|--------------------------|--------------------------|--------------------------|--------------------------|
| 5. Ένιωθες κουρασμένος/η.....    | <input type="checkbox"/> | <input type="checkbox"/> | <input type="checkbox"/> | <input type="checkbox"/> |
| 6. Ένιωθες ανήσυχος/η .....      | <input type="checkbox"/> | <input type="checkbox"/> | <input type="checkbox"/> | <input type="checkbox"/> |
| 7. Ένιωθες ενεργητικός/ή.....    | <input type="checkbox"/> | <input type="checkbox"/> | <input type="checkbox"/> | <input type="checkbox"/> |
| 8. Ένιωθες εξουθενωμένος/η ..... | <input type="checkbox"/> | <input type="checkbox"/> | <input type="checkbox"/> | <input type="checkbox"/> |
| 9. Ένιωθες λυπημένος/η.....      | <input type="checkbox"/> | <input type="checkbox"/> | <input type="checkbox"/> | <input type="checkbox"/> |
| 10. Ένιωθες κατάθλιψη.....       | <input type="checkbox"/> | <input type="checkbox"/> | <input type="checkbox"/> | <input type="checkbox"/> |

Παρακαλώ σημειώσε (✓)στο κουτάκι που αντιστοιχεί στην απάντησή σου.

Βρίσκεσαι στο παρόν στάδιο σε θεραπεία (φαρμακευτική αγωγή από το στόμα ή εισπνεόμενη, φυσιοθεραπεία/καθαρισμό αεραγωγών);

Ναι Όχι (συνέχισε στο ερώτημα 17)

Κατά την διάρκεια της περασμένης εβδομάδας, σημείωσε:

11. Πόσο χρόνο ξοδεύεις κάθε μέρα για τις θεραπείες για την ΠΔΚ;
- Πολύ
  - Μέτριο
  - Λίγο
  - Σχεδόν καθόλου

Κατά την διάρκεια της περασμένης εβδομάδας, σημειώστε σε ποιο βαθμό:

|                                                                                   | Καθόλου                  | Λίγο                     | Μέτρια                   | Πολύ                     |
|-----------------------------------------------------------------------------------|--------------------------|--------------------------|--------------------------|--------------------------|
| 12. Οι θεραπείες για την ΠΔΚ, έκαναν την καθημερινή σου ζωή πιο δύσκολη           | <input type="checkbox"/> | <input type="checkbox"/> | <input type="checkbox"/> | <input type="checkbox"/> |
| 13. Ήταν δύσκολο να ενσωματώσεις τις θεραπείες για την ΠΔΚσε καθημερινή βάση..... | <input type="checkbox"/> | <input type="checkbox"/> | <input type="checkbox"/> | <input type="checkbox"/> |

14. Η φυσιοθεραπεία/καθαρση αεραγωγών σε έκανε να αισθάνεσαι πιο γρήγορα κουρασμένος στην καθημερινή σου ζωή .....

*Σκεφτόμενος την υγεία σου κατα την διάρκεια της περασμένης εβδομάδας, σημείωσε σε ποιο βαθμό η κάθε πρόταση ισχύει για εσένα.*

- |                                                                                                | Πολύ αληθές              | Κυρίως αληθές            | Λίγο αληθές              | Καθόλου αληθές           |                          |
|------------------------------------------------------------------------------------------------|--------------------------|--------------------------|--------------------------|--------------------------|--------------------------|
| 15. Νιώθω άνετα να βήχω μπροστά σε άλλους.....                                                 | <input type="checkbox"/> | <input type="checkbox"/> | <input type="checkbox"/> | <input type="checkbox"/> |                          |
| 16. Ανησυχώ μήπως έλθω σε έπαφη σε άλλους που είναι άρωστοι.....                               | <input type="checkbox"/> | <input type="checkbox"/> | <input type="checkbox"/> | <input type="checkbox"/> |                          |
| 17. Αισθάνομαι μοναξιά.....                                                                    | <input type="checkbox"/> | <input type="checkbox"/> | <input type="checkbox"/> | <input type="checkbox"/> |                          |
| 18. Νιώθω άνετα να φυσώ την μύτη μου μπροστά σε άλλους.....                                    | <input type="checkbox"/> | <input type="checkbox"/> | <input type="checkbox"/> | <input type="checkbox"/> | Δεν ισχύει               |
| 19. Αισθάνομαι άνετα να κάνω θεραπεία (κάθαρση αεραγωγών/φυσιοθεραπεία) μπροστά σε άλλους..... | <input type="checkbox"/> | <input type="checkbox"/> | <input type="checkbox"/> | <input type="checkbox"/> | <input type="checkbox"/> |

## Μέρος II. Σχολείο, Δουλειά, ή Καθημερινές Δραστηριότητες

*Κατά την διάρκεια της περασμένης εβδομάδας:*

20. Σε ποιο βαθμό είχες δυσκολία να ανταποκριθείς στις ανάγκες της δουλειάς σου, τις οικιακές εργασίες ή άλλες καθημερινές δραστηριότητες;
- Δεν είχες πρόβλημα να ανταποκριθείς
  - Κατάφερες να ανταποκριθείς αλλά με δυσκολία.
  - Έμενες πίσω
  - Δεν κατάφερες να κάνεις αυτές τις δραστηριότητες καθόλου

21. Σε ποιο βαθμό, η ΠΑΚ επηρεάζει την εκπλήρωση των στόχων που έχεις στην δουλειά στο σπίτι, στην οικογένεια ή στην προσωπική σου ζωή;

Πολύ  Μέτρια  Λίγο  Καθόλου

*Σκεφτόμενος την υγεία σου την περασμένη εβδομάδα, σημειώσε σε ποιο βαθμό ισχύει η κάθε πρόταση για σένα.*

- |                                                                                               | Πολύ αληθές              | Κυρίως αληθές            | Λίγο αληθές              | Καθόλου αληθές           |
|-----------------------------------------------------------------------------------------------|--------------------------|--------------------------|--------------------------|--------------------------|
| 22. Είναι δύσκολο να σχεδιάζω για το μέλλον (π.χ. αλλαγή δουλειών ή να κάνω οικογένεια) ..... | <input type="checkbox"/> | <input type="checkbox"/> | <input type="checkbox"/> | <input type="checkbox"/> |
| 23. Έχω μία φυσιολογική ζωή .....                                                             | <input type="checkbox"/> | <input type="checkbox"/> | <input type="checkbox"/> | <input type="checkbox"/> |
| 24. Ανησυχώ μήπως η υγεία μου χειροτερεύσει.....                                              | <input type="checkbox"/> | <input type="checkbox"/> | <input type="checkbox"/> | <input type="checkbox"/> |
| 25. Αισθάνομαι υγιής.....                                                                     | <input type="checkbox"/> | <input type="checkbox"/> | <input type="checkbox"/> | <input type="checkbox"/> |
| 26. Καταφέρνω να ενσωματώνω σε καθημερινή βάση τις θεραπείες για την ΠΑΚ.....                 | <input type="checkbox"/> | <input type="checkbox"/> | <input type="checkbox"/> | <input type="checkbox"/> |

Παρακαλώ σημειώσε (✓)στο κουτάκι που αντιστοιχεί στην απάντησή σου.

27. Πως νομίζεις ότι είναι η υγεία σου τώρα;

- a. Άριστη
- b. Καλή
- c. Μέτρια
- d. Κακή

## Μέρος III. Συμπτώματα

Παρακαλώ σημειώσε (✓)στο κουτάκι που αντιστοιχεί στην απάντησή σου.

Σημείωσε πως αισθανόσουν κατά την διάρκεια της περασμένης βδομάδας.

|                                                                                                             | Σε μεγάλο βαθμό          | Μερικώς                  | Λίγο                     | Καθόλου                  |
|-------------------------------------------------------------------------------------------------------------|--------------------------|--------------------------|--------------------------|--------------------------|
| 28. Αισθανόσουν συμφορήση στο στήθος;.....                                                                  | <input type="checkbox"/> | <input type="checkbox"/> | <input type="checkbox"/> | <input type="checkbox"/> |
| 29. Είχες πρόβλημα να ακούς καθαρά (εάν φοράς ακουστικά: είχες πρόβλημα να ακούς καθαρά χωρίς τα ακουστικά) | <input type="checkbox"/> | <input type="checkbox"/> | <input type="checkbox"/> | <input type="checkbox"/> |
| 30. Ένιωθες την μύτη σου να στάζει υγρό προς στον λαιμό σου ( είχες δηλαδή εσωτερική ρινική καταρροή) ..... | <input type="checkbox"/> | <input type="checkbox"/> | <input type="checkbox"/> | <input type="checkbox"/> |
| 31. Είχες πόνο στα ιγμόρεια (στο πρόσωπο ή στο κεφάλι) .....                                                | <input type="checkbox"/> | <input type="checkbox"/> | <input type="checkbox"/> | <input type="checkbox"/> |
| 32. Είχες σφίξιμο στο στήθος .....                                                                          | <input type="checkbox"/> | <input type="checkbox"/> | <input type="checkbox"/> | <input type="checkbox"/> |
| 33. Αναγκαζόσουν να βήχεις φλέγματα .....                                                                   | <input type="checkbox"/> | <input type="checkbox"/> | <input type="checkbox"/> | <input type="checkbox"/> |

Εάν η απάντησή σου είναι Καθόλου συνεχίστε στην ερώτηση 35

Κατά την διάρκεια της περασμένης βδομάδας:

34. Το φλέγμα σου ήταν κυρίως
- |                                    |                                                  |                                         |
|------------------------------------|--------------------------------------------------|-----------------------------------------|
| <input type="checkbox"/> Καθαρό    | <input type="checkbox"/> Καθαρό προς κίτρινο     | <input type="checkbox"/> Κιτρινοπράσινο |
| <input type="checkbox"/> Πρασινωπό | <input type="checkbox"/> Πράσινο με ίχνη αίματος | <input type="checkbox"/> Δεν γνωρίζω    |

Σημείωσε πόσο συχνά κατά την προηγούμενη βδομάδα:

|                                                                                                         | Πάντα                    | Συχνά                    | Μερικές φορές            | Ποτέ                     |
|---------------------------------------------------------------------------------------------------------|--------------------------|--------------------------|--------------------------|--------------------------|
| 35. Είχες δύσπνοια σε περιπτώσεις πιο έντονης δραστηριότητας (π.χ. οικιακές εργασίες ή κηπουρική) ..... | <input type="checkbox"/> | <input type="checkbox"/> | <input type="checkbox"/> | <input type="checkbox"/> |
| 36. Είχες συριγμό όταν ανάπνεες.....                                                                    | <input type="checkbox"/> | <input type="checkbox"/> | <input type="checkbox"/> | <input type="checkbox"/> |
| 37. Είχες ρινική καταρροή .....                                                                         | <input type="checkbox"/> | <input type="checkbox"/> | <input type="checkbox"/> | <input type="checkbox"/> |

Σημείωσε πόσο συχνά κατά την περασμένη βδομάδα:

|                                          | Πάντα                    | Συχνά                    | Μερικές φορές            | Ποτέ                     |
|------------------------------------------|--------------------------|--------------------------|--------------------------|--------------------------|
| 38. Είχες δύσπνοια όταν μιλούσες .....   | <input type="checkbox"/> | <input type="checkbox"/> | <input type="checkbox"/> | <input type="checkbox"/> |
| 39. Ένιωθες τα αυτιά σου βουλωμένα ..... | <input type="checkbox"/> | <input type="checkbox"/> | <input type="checkbox"/> | <input type="checkbox"/> |
| 40. Είχες μπλοκαρισμένη μύτη .....       | <input type="checkbox"/> | <input type="checkbox"/> | <input type="checkbox"/> | <input type="checkbox"/> |

Παρακαλώ βεβαιώσου ότι απάντησες όλες τις ερωτήσεις.

**ΣΕ ΕΥΧΑΡΙΣΤΟΥΜΕ**
